# Supplementary material
Source: publisher figshare collection journal article supplement (https://gsapubs.figshare.com/ndownloader/files/22743380)
Supplement: Supplementary file 1 [file 22743380]

GSA Data Repository item 2001083: Field, experimental, and mass spectrometry techniques and data (Supplement to Geology article “A demonstration of significant abiotic iron isotope fractionation in nature”, by T.D. Bullen, A.F. White, C.W. Childs, D.V. Vivit, and M.S. Schulz)

## **FIELD METHODS**

Spring- and stream-water samples were collected in March 1999 from the field site on the western flank of Mt. Ruapehu. Samples were filtered through a 0.1  $\mu\text{m}$  filter and acidified with Teflon-distilled HCl in the field. Chemical analysis revealed that the spring water sample contained less Fe than the sample collected and reported by Childs et al. (1982) for a December 1978 sampling, possibly because of unanticipated ferrihydrite precipitation in the spring vent or sampling vessel. Therefore we used the Fe concentration of the sample collected in December, 1978 as the true spring composition, and calculated percentage of spring water Fe remaining in the stream water based on the Fe/B ratio (assuming conservative behavior for boron). Ferrihydrite samples were collected from the streambed at the time and site of water-sample collection by scraping the fluffy surface material into a collection beaker.

## **LABORATORY EXPERIMENTS**

Batch and “steady-state” ferrihydrite precipitation experiments were conducted by oxidizing ferrous chloride solution in a  $\text{CO}_2\text{-HCO}_3^-$ -buffered pH-stat reactor at  $\sim 22^\circ\text{C}$ . In the batch experiment conducted at  $\text{pH} = 5.9$ , a research-grade equilibrated gas mixture consisting of 5%  $\text{CO}_2$  + 95% air was bubbled through distilled water in a continuously stirred reaction vessel. Once solution pH steadied, the water was titrated to a pH of 6.0 by addition of 1 M  $\text{NaHCO}_3$ . Sufficient  $\text{Fe(II)Cl}_2$  solution, prepared in a pure  $\text{N}_2$  environment, was injected into the reaction vessel to provide a starting solution concentration of 0.7 mM Fe. As Fe precipitated, pH was held

constant by automatic metered additions of 1 M NaHCO<sub>3</sub>. Incremental samples of solution and suspended ferrihydrite were collected by extracting a small sample of the reactor contents through a 0.45 µm cellulose acetate filter as the amount of Fe(II) in solution decreased from 99% to 15% of the starting concentration.

The steady-state experiments utilized a flow-through design that minimized potential isotopic back reaction between the solid and aqueous phases. The procedure for the steady-state experiments was identical to that for the batch experiment except that (1) gas mixtures consisting of both 5% CO<sub>2</sub> + 95% air and 1% CO<sub>2</sub> + 99% air were used to saturate the distilled water, (2) the water, at a flow rate of ~1 L/h, and Fe(II)Cl<sub>2</sub> solution, at a constant flow rate sufficient to provide a starting solution concentration of 0.7 mM Fe were continuously metered into the reaction vessel throughout each experiment, and (3) experiments were carried out over a range of pH from 5.4 to 6.2. Upon reaching the steady-state condition of constant Fe(II)-Fe(III) aqueous concentrations, samples of suspended ferrihydrite and coexisting solution were collected for analysis. Because water and Fe(II)Cl<sub>2</sub> solution were each metered into the reaction vessel at the same rates in each experiment, steady-state Fe(II) aqueous concentrations provide a direct comparative measure of the Fe(II) oxidation reaction rate.

Concentrations of aqueous species in the experimental and natural waters were determined by using the speciation code WATEQ4 (Ball and Nordstrom, 1991). Input parameters for the experimental waters included total C (determined by equilibrium with CO<sub>2</sub>), Fe(II) (determined by using the ferrozine method), Cl and Na (calculated from quantities added), pH, and estimated pE. Input parameters for the Tongariro waters included total chemistry and pH reported by Childs et al. (1982) and estimated pE.

## SAMPLE PREPARATION AND MASS SPECTROMETRY

Fe isotope compositions were measured by using a Finnigan MAT 261 thermal-ionization mass spectrometer (TIMS) and employing a  $^{57}\text{Fe}$ - $^{58}\text{Fe}$  double-spike amendment to allow for correction of analytically-induced isotope fractionation of the  $^{56}\text{Fe}/^{54}\text{Fe}$  ratio (Johnson and Beard, 1999; Johnson et al., 1999). The double-spike method is a well-established procedure, and the particular algorithm used here is identical to that described previously for analysis of selenium isotope compositions on the same TIMS instrument (Johnson et al., 1999). The Fe isotope composition used as the initial “best-guess” of the natural composition in the iterative procedure was that reported by Johnson and Beard (1999) for “bulk earth-moon” based on analysis of an array of lunar and terrestrial igneous rocks. The composition of the  $^{57}\text{Fe}$ - $^{58}\text{Fe}$  double-spike and the consistent ratio of sample:spike were chosen to provide a mixture in which greater than 90% of  $^{54}\text{Fe}$  and  $^{56}\text{Fe}$  were derived from the sample and greater than 90% of  $^{57}\text{Fe}$  and  $^{58}\text{Fe}$  were derived from the double spike.

For sample preparation, sufficient volume of water, ferrihydrite (dissolved in 6 N HCl), or pre-dissolved U.S.G.S. standard basalt BIR-1 to provide 1.25  $\mu\text{g}$  Fe was mixed with a fixed amount of  $^{57}\text{Fe}$ - $^{58}\text{Fe}$  double-spike tracer and evaporated, then treated with  $\text{H}_2\text{O}_2$  to eradicate organic components and re-dissolved in 6 N HCl. This procedure resulted in consistent sample:spike ratios ( $\pm 5\%$ ) in all measured samples. Fe in each sample was then purified using AG1-X8 anion exchange resin by first loading the sample onto the column in the 6N HCl solution, rinsing the column several times with 6N HCl, and finally stripping the Fe with 0.5N HCl. Prior to loading into the TIMS, purified Fe samples were mixed with a small amount of phosphoric acid, treated again with  $\text{H}_2\text{O}_2$  and deposited onto single Re filaments in a mixture of colloidal silica and alumina.

Isotopes were measured in blocks consisting of 10 sets of three sequential scans:  $^{56}\text{Fe}$ - $^{57}\text{Fe}$ - $^{58}\text{Fe}$  (simultaneously),  $^{54}\text{Fe}$ - $^{56}\text{Fe}$  (simultaneously), all on Faraday collectors, and  $^{52}\text{Cr}$  on an ion counting device to correct for occasional minor isobaric interference of  $^{54}\text{Cr}$  on  $^{54}\text{Fe}$  (assuming  $^{54}\text{Cr}/^{52}\text{Cr} = 0.0282$ ; Matzar, 1978).  $^{60}\text{Ni}$  was likewise monitored using the ion counter, but rather than make a correction for isobaric interference of  $^{58}\text{Ni}$  on  $^{58}\text{Fe}$ , block data was rejected if the signal was  $> 50$  cps. Baseline counts were measured prior to and after each block. Individual sample filaments were analyzed until the standard deviation of the accumulated block average of the  $^{56}\text{Fe}/^{54}\text{Fe}$  ratio was 0.15‰ or better. Total procedural replicate analyses were made for each sample, and all replicates agreed within 0.20‰. All analyses are quoted in standard per mil notation using the Icelandic basalt BIR-1 as the standard; positive values indicate relative enrichment in the heavier isotope.

## REFERENCES

- Ball, J.W., and Nordstrom, D.K., 1991, WATEQ4F--User's manual with revised thermodynamic data base and test cases for calculating speciation of major, trace and redox elements in natural waters: U.S. Geological Survey Open-File Report, v. 91-183, p. 185 p.
- Childs, C.W., Downes, C.J., and Wells, N., 1982, Hydrous iron oxide minerals with short range order deposited in a spring/stream system, Tongariro National Park, New Zealand: Australian Journal of Soil Resources., v. 20, p. 119-129.
- Johnson, C.M., and Beard, B.L., 1999, Correction of instrumentally produced mass fractionation during isotopic analysis of Fe by thermal ionization mass spectrometry: International Journal of Mass Spectrometry, v. 193, p. 87-99.
- Johnson, T.M., Herbel, M.J., Bullen, T.D., and Zawislanski, P.T., 1999, Selenium isotope ratios

as indicators of selenium sources and oxyanion reduction: *Geochimica Cosmochimica Acta*, v. 63, p. 2775-2783.

Matzar, E. and Shiraki, K., 1978, Chromium, *in* Wedepohl, K.H., ed., Handbook of geochemistry, elements Cr (24) to Br (35), v. II/3: New York, Springer-Verlag, 70 p.

**TABLE 1. CHEMICAL AND ISOTOPIC DATA FOR FIELD SAMPLES**

| <b>Sample</b>             | <b>Distance<br/>(m)</b> | <b>pH</b>  | <b>Fe<br/>(ppm)</b> | <b>Fe/B<br/>(ppm)</b> | <b><math>\delta^{56}\text{Fe}</math><br/>(replicate 1)</b> | <b><math>\delta^{56}\text{Fe}</math><br/>(replicate 2)</b> | <b><math>\delta^{56}\text{Fe}</math>, average<br/>(std. dev.)</b> |
|---------------------------|-------------------------|------------|---------------------|-----------------------|------------------------------------------------------------|------------------------------------------------------------|-------------------------------------------------------------------|
| <b>spring</b>             | <b>0</b>                | <b>5.8</b> | <b>30</b>           | <b>15.0</b>           |                                                            |                                                            |                                                                   |
| <b>Ton 1-water</b>        | <b>0</b>                | <b>6.0</b> | <b>10.2</b>         | <b>10.2</b>           | <b>-0.66‰</b>                                              | <b>-0.83‰</b>                                              | <b>-0.74‰</b><br>(0.12‰)                                          |
| <b>Ton 1-ferrihydrite</b> | <b>0</b>                |            |                     |                       | <b>+0.18‰</b>                                              | <b>+0.04‰</b>                                              | <b>+0.11‰</b><br>(0.10‰)                                          |
| <b>Ton 5-water</b>        | <b>200</b>              | <b>6.8</b> | <b>7.9</b>          | <b>9.5</b>            | <b>-0.85‰</b>                                              | <b>-1.05‰</b>                                              | <b>-0.95‰</b><br>(0.14‰)                                          |
| <b>Ton 5-ferrihydrite</b> | <b>200</b>              |            |                     |                       | <b>-0.22‰</b>                                              | <b>-0.10‰</b>                                              | <b>-0.16‰</b><br>(0.08‰)                                          |
| <b>Ton 6- water</b>       | <b>400</b>              | <b>7.2</b> | <b>3.6</b>          | <b>6.5</b>            | <b>-1.28‰</b>                                              | <b>-1.41‰</b>                                              | <b>-1.34‰</b><br>(0.09‰)                                          |
| <b>Ton 6-ferrihydrite</b> | <b>400</b>              |            |                     |                       | <b>-0.34‰</b>                                              | <b>-0.52‰</b>                                              | <b>-0.43‰</b><br>(0.13‰)                                          |
| <b>Ton 7- water</b>       | <b>600</b>              | <b>7.5</b> | <b>1.1</b>          | <b>2.1</b>            | <b>-2.06‰</b>                                              | <b>-2.15‰</b>                                              | <b>-2.10‰</b><br>(0.06‰)                                          |
| <b>Ton 7-ferrihydrite</b> | <b>600</b>              |            |                     |                       | <b>-1.04‰</b>                                              | <b>-1.16‰</b>                                              | <b>-1.10‰</b><br>(0.08‰)                                          |
| <b>Ton 8- water</b>       | <b>900</b>              | <b>7.5</b> | <b>0.2</b>          | <b>1.2</b>            | <b>-2.29‰</b>                                              | <b>-2.11‰</b>                                              | <b>-2.20‰</b><br>(0.13‰)                                          |
| <b>Ton 8-ferrihydrite</b> | <b>900</b>              |            |                     |                       | <b>-1.48‰</b>                                              | <b>-1.35‰</b>                                              | <b>-1.42‰</b><br>(0.09‰)                                          |
| <b>Ton 9- water</b>       | <b>1600</b>             | <b>7.6</b> | <b>0.1</b>          | <b>0.3</b>            | <b>-2.08‰</b>                                              | <b>-2.22‰</b>                                              | <b>-2.15‰</b><br>(0.10‰)                                          |
| <b>Ton 9-ferrihydrite</b> | <b>1600</b>             |            |                     |                       | <b>-2.08‰</b>                                              | <b>-1.96‰</b>                                              | <b>-2.02‰</b><br>(0.08‰)                                          |

**TABLE 2. ISOTOPIC DATA, BATCH FERRIHYDRITE PRECIPITATION**

| <b>Sample</b>             | <b>Gas mixture</b>                   | <b>pH</b>  | <b>Reaction time (hours)</b> | <b>Fe (ppm)</b> | <b><math>\delta^{56}\text{Fe}</math> (replicate 1)</b> | <b><math>\delta^{56}\text{Fe}</math> (replicate 2)</b> | <b><math>\delta^{56}\text{Fe}</math>, average (std. dev.)</b> |
|---------------------------|--------------------------------------|------------|------------------------------|-----------------|--------------------------------------------------------|--------------------------------------------------------|---------------------------------------------------------------|
| <b>Initial</b>            | <b>5% CO<sub>2</sub><br/>95% air</b> | <b>5.9</b> | <b>0</b>                     | <b>39.0</b>     | <b>-0.51‰</b>                                          | <b>-0.68‰</b>                                          | <b>-0.60‰ (0.12‰)</b>                                         |
| <b>FE C1 Solution</b>     | “                                    | “          | <b>0.1</b>                   | <b>38.6</b>     | <b>-0.60‰</b>                                          | <b>-0.71‰</b>                                          | <b>-0.66‰ (0.08‰)</b>                                         |
| <b>Fe C1 ferrihydrite</b> | “                                    | “          | <b>0.1</b>                   | -               | <b>+0.20‰</b>                                          | <b>+0.29‰</b>                                          | <b>+0.24‰ (0.06‰)</b>                                         |
| <b>Fe C2 Solution</b>     | “                                    | “          | <b>1.5</b>                   | <b>30.8</b>     | <b>-0.83‰</b>                                          | <b>-1.01‰</b>                                          | <b>-0.92‰ (0.13‰)</b>                                         |
| <b>Fe C2 Ferrihydrite</b> | “                                    | “          | <b>1.5</b>                   | -               | <b>+0.11‰</b>                                          | <b>-0.05‰</b>                                          | <b>+0.03‰ (0.11‰)</b>                                         |
| <b>Fe C3 Solution</b>     | “                                    | “          | <b>3.7</b>                   | <b>29.3</b>     | <b>-1.05‰</b>                                          | <b>-1.11‰</b>                                          | <b>-1.08‰ (0.04‰)</b>                                         |
| <b>Fe C3 Ferrihydrite</b> | “                                    | “          | <b>3.7</b>                   | -               | <b>-0.06‰</b>                                          | <b>-0.16‰</b>                                          | <b>-0.11‰ (0.07‰)</b>                                         |
| <b>Fe C4 Solution</b>     | “                                    | “          | <b>5.5</b>                   | <b>23.8</b>     | <b>-1.19‰</b>                                          | <b>-1.33‰</b>                                          | <b>-1.26‰ (0.10‰)</b>                                         |
| <b>Fe C4 Ferrihydrite</b> | “                                    | “          | <b>5.5</b>                   | -               | <b>-0.06‰</b>                                          | <b>-0.26‰</b>                                          | <b>-0.16‰ (0.14‰)</b>                                         |
| <b>Fe C5 Solution</b>     | “                                    | “          | <b>7.0</b>                   | <b>16.4</b>     | <b>-1.55‰</b>                                          | <b>-1.45‰</b>                                          | <b>-1.50‰ (0.07‰)</b>                                         |
| <b>Fe C5 Ferrihydrite</b> | “                                    | “          | <b>7.0</b>                   | -               | <b>-0.40‰</b>                                          | <b>-0.53‰</b>                                          | <b>-0.47‰ (0.09‰)</b>                                         |
| <b>Fe C6 Solution</b>     | “                                    | “          | <b>24.0</b>                  | <b>5.9</b>      | <b>-2.32‰</b>                                          | <b>-2.15‰</b>                                          | <b>-2.24‰ (0.12‰)</b>                                         |
| <b>Fe C6 Ferrihydrite</b> | “                                    | “          | <b>24.0</b>                  | -               | <b>-0.72‰</b>                                          | <b>-0.86‰</b>                                          | <b>-0.79‰ (0.10‰)</b>                                         |

**TABLE 3. ISOTOPIC DATA, STEADY-STATE FERRIHYDRITE PRECIPITATION**

| <b>Sample</b>             | <b>Gas mixture</b>                   | <b>pH</b>  | <b>Reaction time (hours)</b> | <b>Fe (ppm)</b> | <b><math>\delta^{56}\text{Fe}</math> (replicate 1)</b> | <b><math>\delta^{56}\text{Fe}</math> (replicate 2)</b> | <b><math>\delta^{56}\text{Fe}</math>, average (std. dev.)</b> |
|---------------------------|--------------------------------------|------------|------------------------------|-----------------|--------------------------------------------------------|--------------------------------------------------------|---------------------------------------------------------------|
| <b>Initial</b>            |                                      | <b>all</b> | <b>0</b>                     | <b>39.0</b>     | <b>-0.51‰</b>                                          | <b>-0.68‰</b>                                          | <b>-0.60‰ (0.12‰)</b>                                         |
| <b>FI-5 Solution</b>      | <b>5% CO<sub>2</sub><br/>95% air</b> | <b>5.4</b> | <b>7.0</b>                   | <b>36.1</b>     | <b>-0.56‰</b>                                          | <b>-0.70‰</b>                                          | <b>-0.63‰ (0.10‰)</b>                                         |
| <b>FI-5 ferrihydrite</b>  | “                                    | “          | “                            | -               | <b>-0.14‰</b>                                          | <b>-0.26‰</b>                                          | <b>-0.20‰ (0.08‰)</b>                                         |
| <b>FI-4 Solution</b>      | “                                    | <b>5.6</b> | <b>8.3</b>                   | <b>31.1</b>     | <b>-0.73‰</b>                                          | <b>-0.63‰</b>                                          | <b>-0.68‰ (0.07‰)</b>                                         |
| <b>FI-4 Ferrihydrite</b>  | “                                    | “          | “                            | -               | <b>-0.06‰</b>                                          | <b>-0.24‰</b>                                          | <b>-0.15‰ (0.13‰)</b>                                         |
| <b>FI-2 Solution</b>      | “                                    | <b>5.8</b> | <b>6.5</b>                   | <b>28.0</b>     | <b>-0.88‰</b>                                          | <b>-0.72‰</b>                                          | <b>-0.80‰ (0.11‰)</b>                                         |
| <b>FI-2 Ferrihydrite</b>  | “                                    | “          | “                            | -               | <b>+0.00‰</b>                                          | <b>+0.10‰</b>                                          | <b>+0.05‰ (0.07‰)</b>                                         |
| <b>FI-8 Solution</b>      | “                                    | <b>6.0</b> | <b>6.0</b>                   | <b>6.6</b>      | <b>-1.84‰</b>                                          | <b>-2.04‰</b>                                          | <b>-1.94‰ (0.14‰)</b>                                         |
| <b>FI-8 Ferrihydrite</b>  | “                                    | “          | “                            | -               | <b>-0.32‰</b>                                          | <b>-0.44‰</b>                                          | <b>-0.38‰ (0.08‰)</b>                                         |
| <b>FI-13 Solution</b>     | <b>1% CO<sub>2</sub><br/>99% air</b> | <b>5.5</b> | <b>7.0</b>                   | <b>36.4</b>     | <b>-0.54‰</b>                                          | <b>-0.67‰</b>                                          | <b>-0.60‰ (0.09‰)</b>                                         |
| <b>FI-13 Ferrihydrite</b> | “                                    | “          | “                            | -               | <b>+0.28‰</b>                                          | <b>+0.20‰</b>                                          | <b>+0.24‰ (0.05‰)</b>                                         |
| <b>FI-12 Solution</b>     | “                                    | <b>5.7</b> | <b>4.5</b>                   | <b>33.6</b>     | <b>-0.58‰</b>                                          | <b>-0.74‰</b>                                          | <b>-0.66‰ (0.11‰)</b>                                         |
| <b>FI-12 Ferrihydrite</b> | “                                    | “          | “                            | -               | <b>-0.22‰</b>                                          | <b>-0.08‰</b>                                          | <b>-0.15‰ (0.10‰)</b>                                         |
| <b>FI-14 Solution</b>     | “                                    | <b>5.9</b> | <b>8.0</b>                   | <b>30.8</b>     | <b>-0.82‰</b>                                          | <b>-0.71‰</b>                                          | <b>-0.76‰ (0.08‰)</b>                                         |
| <b>FI-14 Ferrihydrite</b> | “                                    | “          | “                            | -               | <b>+0.03‰</b>                                          | <b>-0.13‰</b>                                          | <b>-0.05‰ (0.11‰)</b>                                         |
| <b>FI-7 Solution</b>      | “                                    | <b>6.1</b> | <b>7.5</b>                   | <b>0.9</b>      | <b>-1.39‰</b>                                          | <b>-1.29‰</b>                                          | <b>-1.34‰ (0.07‰)</b>                                         |
| <b>FI-7 Ferrihydrite</b>  | “                                    | “          | “                            | -               | <b>-0.60‰</b>                                          | <b>-0.44‰</b>                                          | <b>-0.52‰ (0.11‰)</b>                                         |
| <b>FI-6 Solution</b>      | “                                    | <b>6.2</b> | <b>7.3</b>                   | <b>0.1</b>      | <b>-1.51‰</b>                                          | <b>-1.63‰</b>                                          | <b>-1.57‰ (0.08‰)</b>                                         |
| <b>FI-6 Ferrihydrite</b>  | “                                    | “          | “                            | -               | <b>-0.47‰</b>                                          | <b>-0.64‰</b>                                          | <b>-0.55‰ (0.12‰)</b>                                         |
